# Supplementary material for: Cobalt pyrophosphate (Co2P2O7) derived from an open-framework cobalt phosphite: a durable electroactive material for electrochemical energy conversion and storage application
Source: Royal Society of Chemistry journal article supplement (doi:10.1039/d1se00714a), 2021-01-01
Supplement: d1se00714a1.pdf [file d1se00714a1.pdf]

## Supporting information

### **Cobalt pyrophosphate (Co<sub>2</sub>P<sub>2</sub>O<sub>7</sub>) derived from an Open-Framework Cobalt Phosphite: A Durable Electroactive Material for Electrochemical Energy Conversion and Storage Application**

*Abhisek Padhy, <sup>a, b, c</sup> Aneeya K. Samantara, <sup>a, b, c</sup> J. N. Behera <sup>a, b, c\*</sup>*

<sup>a</sup> National Institute of Science Education and Research (NISER), Khordha 752050, Odisha,  
India

<sup>b</sup> Homi Bhabha National Institute, (HBNI), Mumbai, India

<sup>c</sup> Centre for Interdisciplinary Sciences (CIS), NISER, Jatni, Odisha, India 752050.

\*Email: [jnbehera@niser.ac.in](mailto:jnbehera@niser.ac.in)

➤ **Calculation of electrochemical accessible surface area**

At first, the double layer capacitance ( $C_{dl}$ ) was calculated by plotting the cathodic and anodic peak currents ( $i$ ) against the sweep rate ( $\vartheta$ ) as per the equation 1. Thereafter the ECSA and roughness factor ( $R_f$ ) were determined accordingly (equation 2 and 3).<sup>1,2</sup>

$$C_{dl} = \frac{i}{\vartheta} \dots\dots\dots (1)$$

$$ECSA = \frac{C_{dl}}{C_s} \dots\dots\dots (2)$$

$$R_f = \frac{ECSA}{G_s} \dots\dots\dots (3)$$

Here,  $C_s$  is the standard specific capacitance of an atomically smooth metal oxide surface in alkaline electrolytic condition and its value is 40  $\mu\text{F}/\text{cm}^2$  and the  $G_s$  (geometrical surface area) of the electrode is 1  $\text{cm}^2$ .

➤ **Calculation of specific capacitance, energy and power**

The specific capacitance ( $C_{sp}$ ), energy ( $E_D$ ) and power ( $P_D$ ) were calculated from the CVs recorded at different sweep rates as per the following equations,<sup>3,4</sup>

$$C_{sp} = \frac{\int_{V_a}^{V_c} I(V)dV}{m\vartheta(V_c - V_a)} \dots\dots\dots (4)$$

$$E_D = \frac{C_{sp}(\Delta V)^2}{2} \dots\dots\dots (5)$$

$$P_D = \frac{C_{sp}(\Delta V)\vartheta}{2} \dots\dots\dots (6)$$

Here,  $\int_{V_a}^{V_c} I(V)dV$ ,  $m$ ,  $\vartheta$ ,  $(V_c - V_a)$  and  $\Delta V$  are the integrated surface area under the CV curve, mass of the electrode material loaded on the electrode surface, sweep rate and potential window respectively.

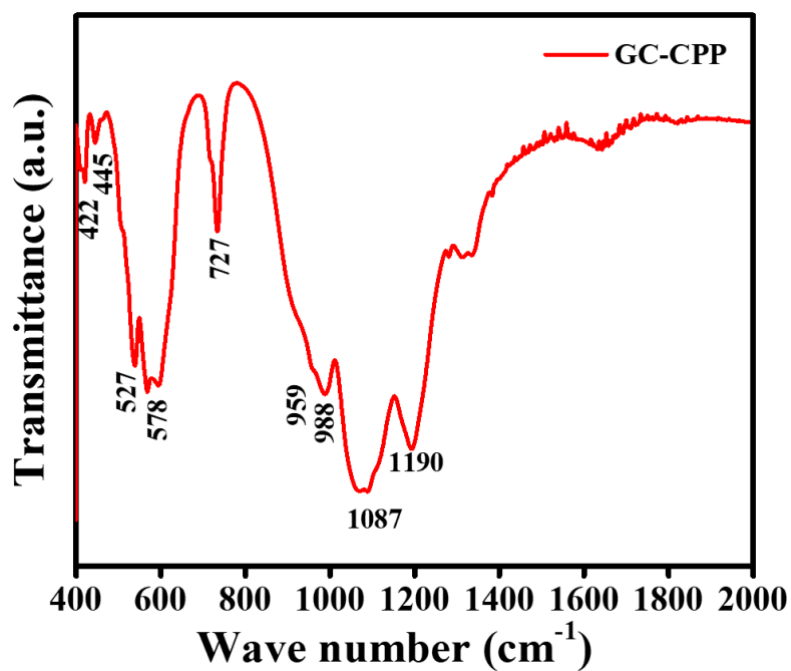

Fig. S1 FTIR spectrum of GC-CPP

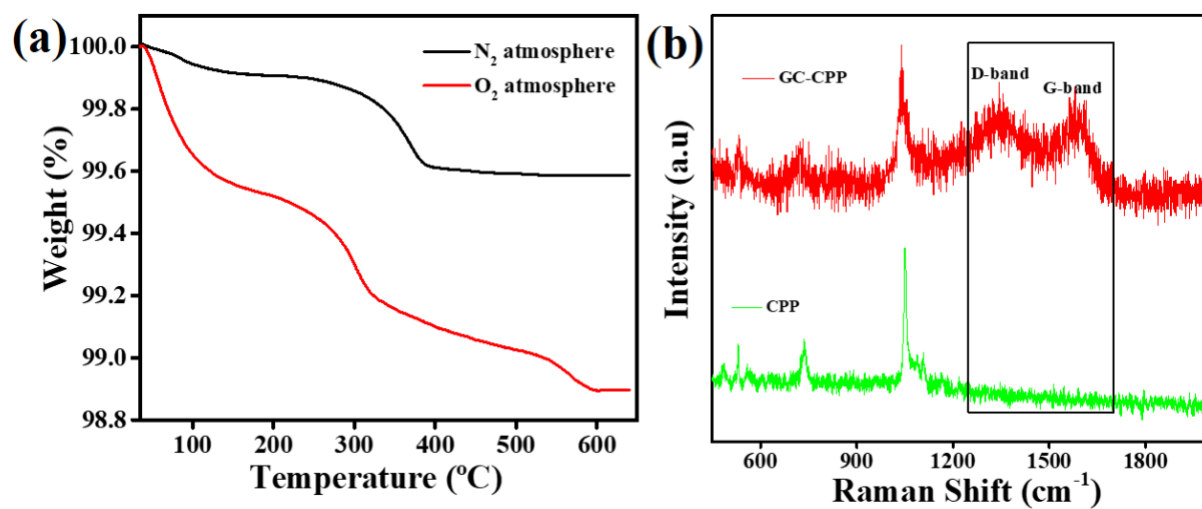

Fig. S2 (a) Thermo gravimetric analysis of GC-CPP in N<sub>2</sub> and air and (b) the corresponding Raman spectra.

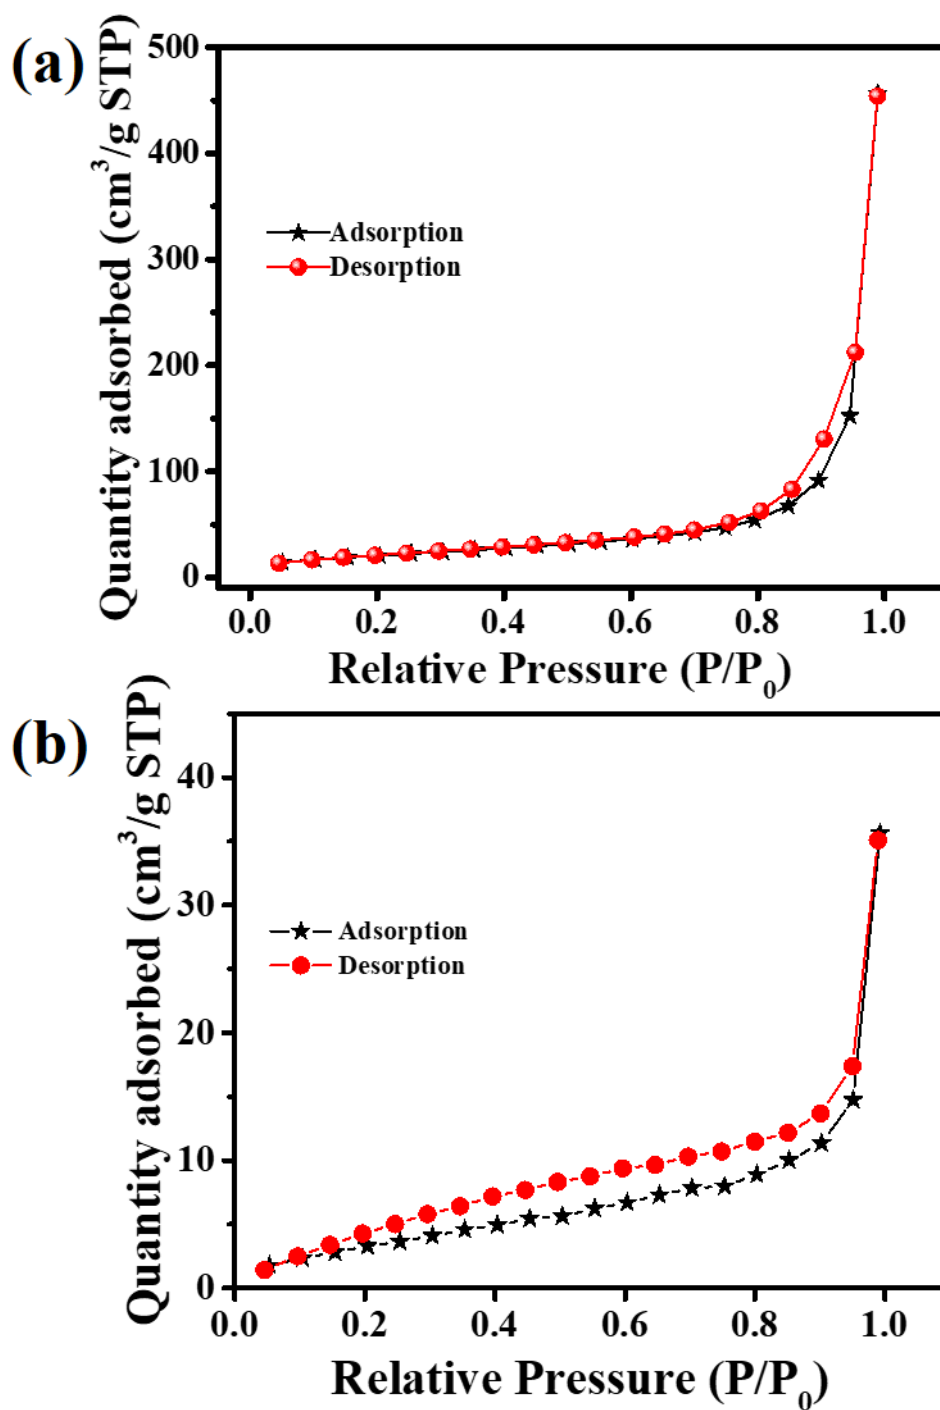

Fig. S3 BET adsorption/desorption isotherms for (a) CoHPO-CJ2 and (b) GC-CPP.

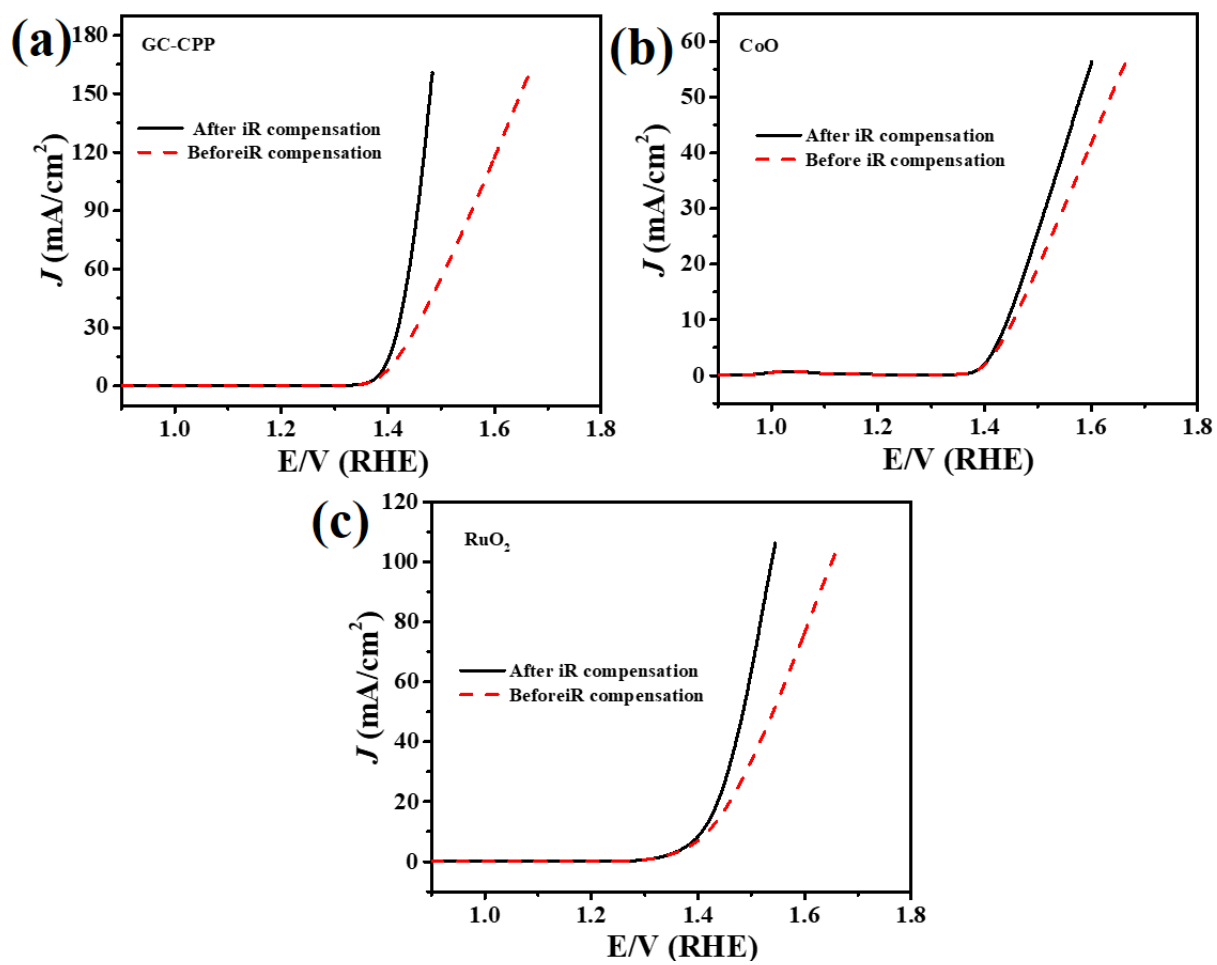

**Fig. S4** Linear sweep voltammograms of GC-CPP, CoO and RuO<sub>2</sub> before and after  $iR$ -compensation.

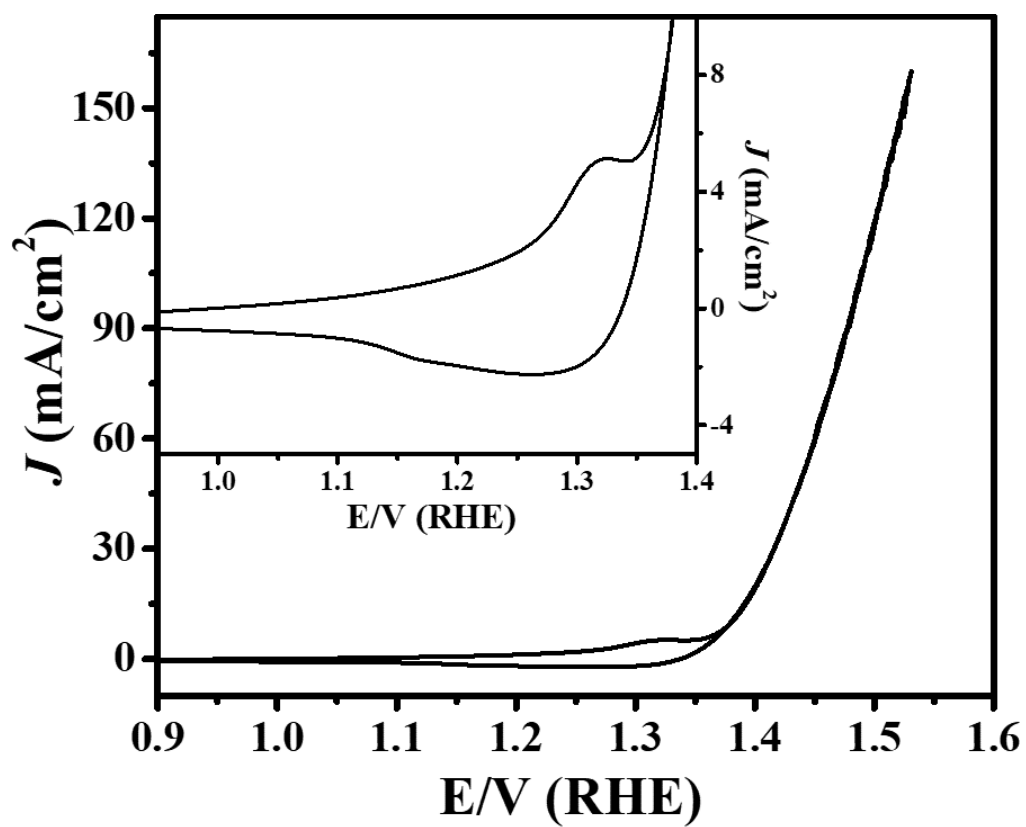

**Fig. S5** Cyclic voltammogram of GC-CPP at 5 mV/s in 1M KOH electrolyte.

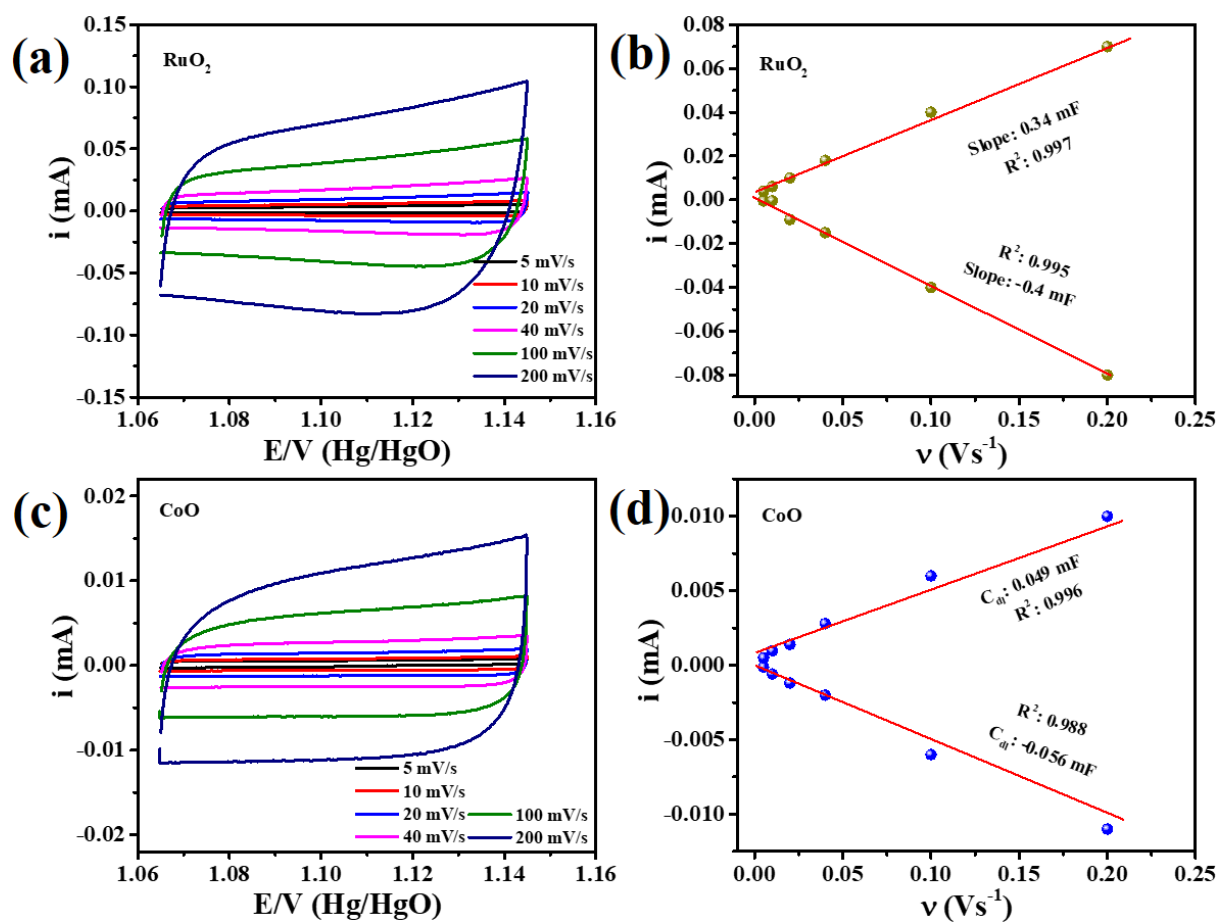

**Fig. S6** (a, c) cyclic voltammograms at different sweep rate in non-Faradic potential window and (b, d) plot of cathodic and anodic current against sweep rate.

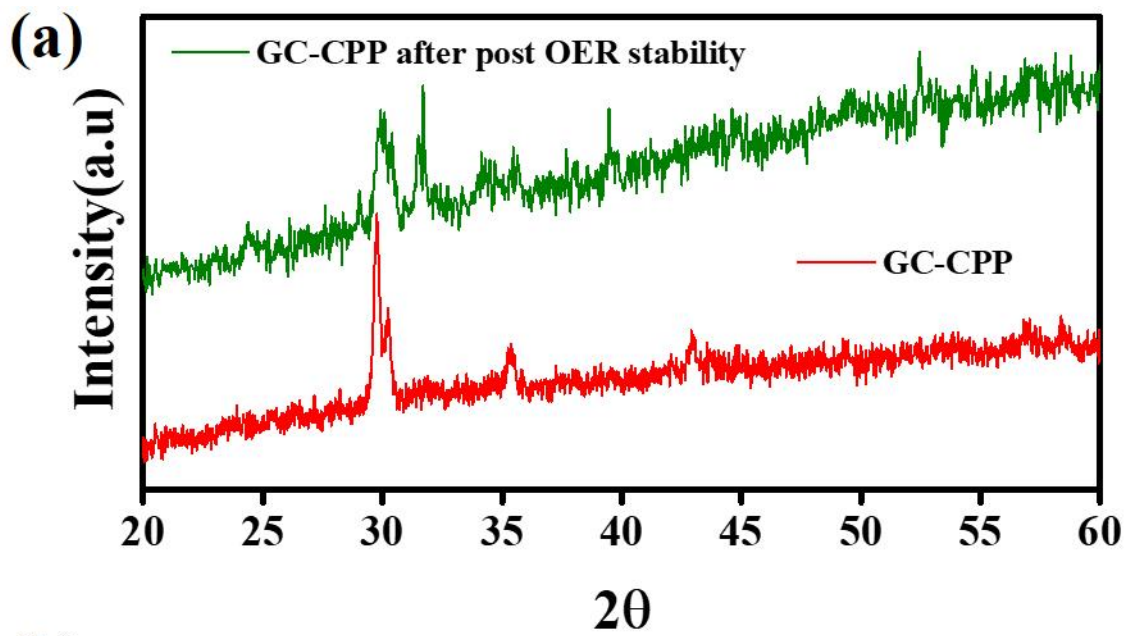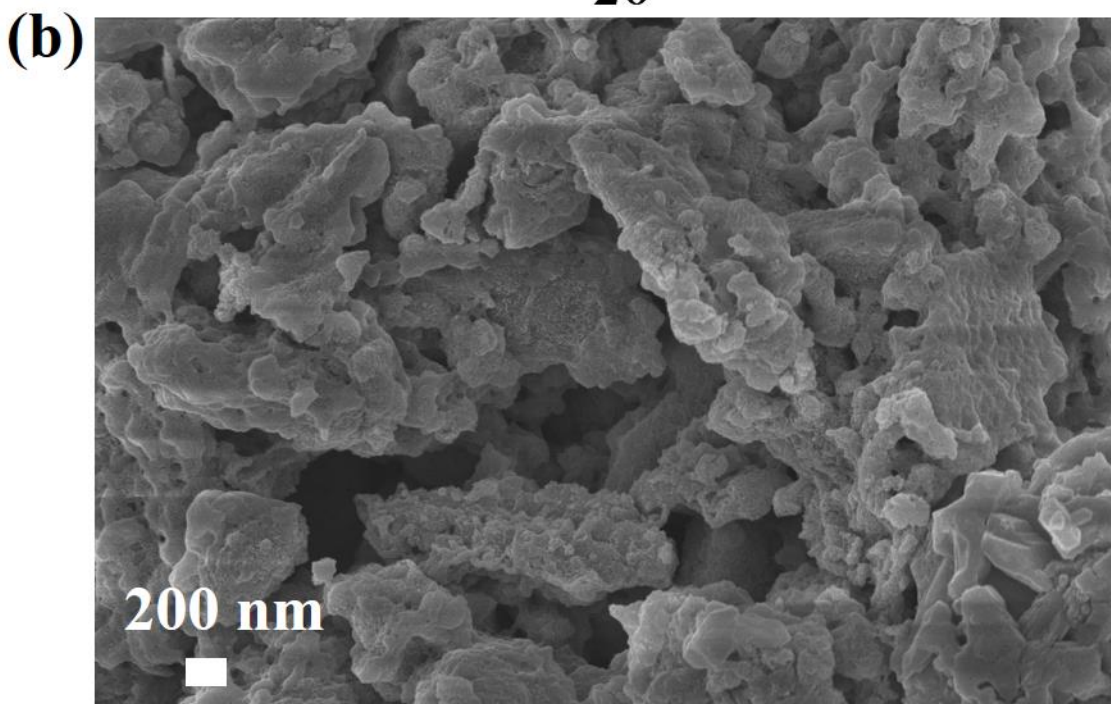

**Fig. S7** (a) PXRD and (b) FESEM of post OER GC-CPP sample



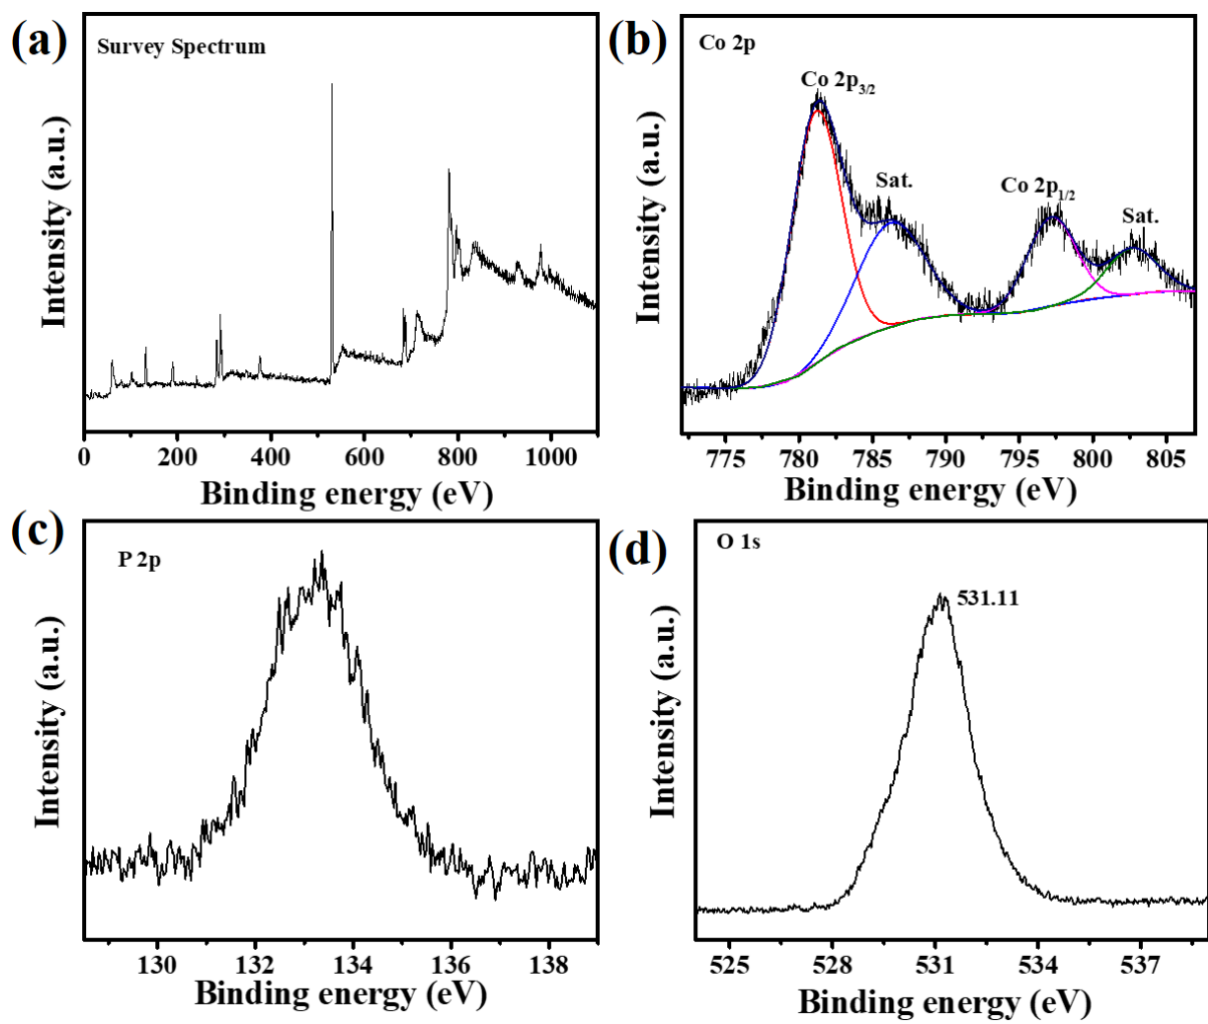

**Fig. S8** (a) survey and high-resolution X-ray photoelectron spectrum of (b) Co 2p, (c) P 2p, (d) O 1s and (e) C 1s of GC-CPP after OER stability measurement.

| Sample                                                                                     | Loading (mg/cm <sup>2</sup> ) | Tafel slope (mV/dec) | Overpotential (V) @ 10 mA/cm <sup>2</sup> | Electrolyte (M) | Electrode            | TOF (s <sup>-1</sup> ) | ECSA (cm <sup>2</sup> ) | R <sub>f</sub> | Ref.         |
|--------------------------------------------------------------------------------------------|-------------------------------|----------------------|-------------------------------------------|-----------------|----------------------|------------------------|-------------------------|----------------|--------------|
| Ultrafine CoP-CNT                                                                          | 0.28                          | 50                   | 0.330                                     | 0.1 (NaOH)      | GCE                  | 0.0287                 | --                      | --             | 5            |
| CoP NRs/C                                                                                  | 0.71                          | 71                   | 0.32                                      | 1 M KOH         | GCRDE                | --                     | --                      | --             | 6            |
| CoP NPs/C                                                                                  | 0.71                          | 99                   | 0.34                                      | 1               |                      | --                     | --                      | --             |              |
| CoMnP                                                                                      | 0.28                          | 61                   | 0.33                                      | 1               | GCRDE                | --                     | --                      | --             | 7            |
| Co <sub>2</sub> P                                                                          | 0.28                          | 128                  | 0.37                                      | 1               |                      | --                     | --                      | --             |              |
| Co <sub>2</sub> P (Nanoneedles)                                                            | 0.2                           | 50                   | 0.31                                      | 1               |                      | --                     | --                      | --             | 8            |
| Co <sub>3</sub> (PO <sub>4</sub> ) <sub>2</sub> @N-C                                       | 0.2                           | 62                   | 0.317                                     | 1               | GCRDE                | --                     | --                      | --             | 9            |
| CoFePi                                                                                     | 0.25                          | 33                   | 0.315                                     | 0.1             | GCRDE                | --                     | 107                     | 1514           | 10           |
| CoFePi                                                                                     | 0.25                          | 31                   | 0.277                                     | 1               |                      | --                     | --                      | --             |              |
| CoPi                                                                                       | 0.25                          | 61                   | 0.388                                     | 0.1             |                      | --                     | 61                      | 864            |              |
| FePi + CoPi                                                                                | 0.25                          | 51                   | 0.355                                     | 0.1             |                      | --                     | --                      | --             |              |
| CoNiPi                                                                                     | 0.25                          | 87                   | 0.402                                     | 0.1             |                      | --                     | --                      | --             |              |
| CoCePi                                                                                     | 0.25                          | 75                   | 0.374                                     | 0.1             |                      | --                     | --                      | --             |              |
| CoFeNiPi                                                                                   | 0.25                          | 51                   | 0.309                                     | 0.1             |                      | --                     | --                      | --             |              |
| NCoM-SS-Ar                                                                                 | 0.14                          | 76                   | 0.340                                     | 1               | GCRDE                | --                     | --                      | --             | 11           |
| Mesoporous CoPi-1                                                                          | 0.2                           | 58.7                 | 0.380                                     | 1               | GCRDE                | 0.018                  | --                      | --             | 12           |
| Hollow Co <sub>3</sub> (PO <sub>4</sub> ) <sub>2</sub>                                     | 0.12                          | 84                   | N.A.                                      | 1               | GCRDE                | --                     | --                      | --             | 13           |
| Co <sub>3</sub> (OH) <sub>2</sub> (HPO <sub>4</sub> ) <sub>2</sub> /NF                     | 2                             | 69                   | 0.240                                     | 1               | NF                   | 4.38×10 <sup>-3</sup>  | 2.52                    | --             | 14           |
| Co <sub>2</sub> P <sub>2</sub> O <sub>7</sub>                                              | 0.5                           | 54.1                 | 0.359                                     | 1               | GCE                  | 0.058                  | 231.5                   | 1837.3         | 15           |
| Na <sub>2</sub> Co <sub>0.75</sub> Fe <sub>0.25</sub> P <sub>2</sub> O <sub>7</sub> /C NPs | -                             | 47                   | 0.300                                     | 0.1             | GCE                  | --                     | --                      | --             | 16           |
| Co <sub>2</sub> (P <sub>2</sub> O <sub>7</sub> )                                           | 0.5                           | 41                   | 0.165                                     | 1               | Stainless steel mesh | 7.95                   | 13.52                   | 13.52          | Present work |

**Table S1** OER performance comparison of GC-CPP with reported materials. GCE: glassy carbon electrode, GCRDE: glassy carbon rotating disk electrode, NF: nickel foam

**Table S2** Charge storage performance comparison of GC-CPP with reported materials

| Materials                                                                                                                     | Specific Capacitance (F/g)          | Potential window (V) | Current density (A/g) | Energy density (Wh/kg) | Power density (W/kg) | Reference    |
|-------------------------------------------------------------------------------------------------------------------------------|-------------------------------------|----------------------|-----------------------|------------------------|----------------------|--------------|
| Co <sub>2</sub> P <sub>2</sub> O <sub>7</sub> + AB + PVDF on NF                                                               | 367 in 3M KOH                       | 0.40                 | 0.625                 | 8.16                   | 125                  | 17           |
| Co <sub>0.2</sub> Ni <sub>0.8</sub> Pyrophosphate                                                                             | 1259 in 3M KOH                      | 0.55                 | 1.5                   | 42.4 (Device)          | 800                  | 18           |
| Co <sub>0.6</sub> Ni <sub>1.6</sub> P <sub>2</sub> O <sub>7</sub> /NG+ AB + PTFE on NF                                        | 1473                                | 0.50                 | 1.0                   | 34.9 (Device)          | 800                  | 19           |
| Co <sub>2</sub> P <sub>2</sub> O <sub>7</sub> + Super P carbon + PVDF with redox additive in the electrolyte on Carbon paper. | 580                                 | 0.7                  | 1.0                   | -                      | -                    | 20           |
| CoHPO <sub>4</sub> .3H <sub>2</sub> O + AB + PTFE on NF                                                                       | 413                                 | 0.45                 | 1.5                   | -                      | -                    | 21           |
| Co <sub>3</sub> (PO <sub>4</sub> ) <sub>2</sub> grown on NF                                                                   | 12,285 in 1M KOH @ 5mV/s            | 0.7                  | -                     | 26.66 (Device)         | 750                  | 22           |
| Nickel–Cobalt Phosphate (Ni/Co = 4:5) on NF                                                                                   | 1132.5 in 3M KOH                    | 0.4                  | 1.0                   | -                      | -                    | 23           |
| Co <sub>3</sub> (PO <sub>4</sub> ) <sub>2</sub> .8H <sub>2</sub> O on NF                                                      | 350 in 3M KOH                       | 0.4                  | 1.0                   | -                      | -                    | 24           |
| Ni <sub>3</sub> P <sub>2</sub> O <sub>8</sub> -Co <sub>3</sub> P <sub>2</sub> O <sub>8</sub> (Ni/Co = 8:2)                    | 1974 in 6M KOH                      | 0.4                  | 0.5                   | 33.4 (device)          | 399                  | 25           |
| Co <sub>2</sub> (P <sub>2</sub> O <sub>7</sub> )                                                                              | 900 in 5 M KOH at 1 mV/s<br>500 F/g | 0.45                 | -<br>1.5              | 31.25                  | 21 kW/kg             | Present work |

## References:

- 1 M. K. Sahoo, A. K. Samantara and J. N. Behera, *Inorg. Chem.*, 2020, **59**, 12252–12262.
- 2 C. C. L. McCrory, S. Jung, J. C. Peters and T. F. Jaramillo, *J. Am. Chem. Soc.*, 2013, **135**, 16977–16987.
- 3 R. Ding, L. Qi and H. Wang, *J. Solid State Electrochem.*, 2012, **16**, 3621–3633.
- 4 S. Ratha, A. K. Samantara, K. K. Singha, A. S. Gangan, B. Chakraborty, B. K. Jena and C. S. Rout, *ACS Appl. Mater. Interfaces*, 2017, **9**, 9640–9653.
- 5 K. H. Cho, D. H. Shin, J. Oh, J. H. An, J. S. Lee and J. Jang, *ACS Appl. Mater. Interfaces*, 2018, **10**, 28412–28419.
- 6 J. Chang, Y. Xiao, M. Xiao, J. Ge, C. Liu and W. Xing, *ACS Catal.*, 2015, **5**, 6874–6878.
- 7 D. Li, H. Baydoun, C. N. Verani and S. L. Brock, *J. Am. Chem. Soc.*, 2016, **138**, 4006–4009.
- 8 A. Dutta, A. K. Samantara, S. K. Dutta, B. K. Jena and N. Pradhan, *ACS Energy Lett.*, 2016, **1**, 169–174.
- 9 C. Z. Yuan, Y. F. Jiang, Z. Wang, X. Xie, Z. K. Yang, A. Bin Yousaf and A. W. Xu, *J. Mater. Chem. A*, 2016, **4**, 8155–8160.
- 10 Y. Zhou and H. C. Zeng, *Small*, 2018, **14**, 1704403.
- 11 R. Gond, D. K. Singh, M. Eswaramoorthy and P. Barpanda, *Angew. Chemie*, 2019, **31**, 8418–8423.
- 12 M. Pramanik, C. Li, M. Imura, V. Malgras, Y. M. Kang and Y. Yamauchi, *Small*, 2016, **12**, 1709–1715.
- 13 J. Zhang, Y. Yang, Z. Zhang, X. Xu and X. Wang, *J. Mater. Chem. A*, 2014, **2**, 20182–20188.
- 14 P. W. Menezes, C. Panda, C. Walter, M. Schwarze and M. Driess, *Adv. Funct. Mater.*, 2019, **29**, 1808632.
- 15 H. Du, W. Ai, Z. L. Zhao, Y. Chen, X. Xu, C. Zou, L. Wu, L. Su, K. Nan, T. Yu and C. M. Li, *Small*, 2018, **14**, 1801068.
- 16 H. J. Song, H. Yoon, B. Ju, D. Y. Lee and D. W. Kim, *ACS Catal.*, 2020, **10**, 702–709.
- 17 H. Pang, Z. Yan, Y. Ma, G. Li, J. Chen, J. Zhang, W. Du and S. Li, *J. Solid State Electrochem.*, 2013, **17**, 1383–1391.
- 18 C. Chen, N. Zhang, Y. He, B. Liang, R. Ma and X. Liu, *ACS Appl. Mater. Interfaces*, 2016, **8**, 23114–23121.

- 19 P. Sun, Z. Li, L. Zhang, C. Dong, Z. Li, H. Yao, J. Wang and G. Li, *J. Alloys Compd.*, 2018, **750**, 607–616.
- 20 Z. Khan, B. Senthilkumar, S. Lim, R. Shanker, Y. Kim and H. Ko, *Adv. Mater. Interfaces*, 2017, **4**, 1700059.
- 21 H. Pang, S. Wang, W. Shao, S. Zhao, B. Yan, X. Li, S. Li, J. Chen and W. Du, *Nanoscale*, 2013, **5**, 5752–5757.
- 22 K. V. Sankar, S. C. Lee, Y. Seo, C. Ray, S. Liu, A. Kundu and S. C. Jun, *J. Power Sources*, 2018, **373**, 211–219.
- 23 B. Li, P. Gu, Y. Feng, G. Zhang, K. Huang, H. Xue and H. Pang, *Adv. Funct. Mater.*, 2017, **27**, 1605784.
- 24 H. Li, H. Yu, J. Zhai, L. Sun, H. Yang and S. Xie, *Mater. Lett.*, 2015, **152**, 25–28.
- 25 M. C. Liu, J. J. Li, Y. X. Hu, Q. Q. Yang and L. Kang, *Electrochim. Acta*, 2016, **201**, 142–150.
